# Supplementary material for: AI-driven remote sensing enhances Mediterranean seagrass monitoring and conservation to combat climate change and anthropogenic impacts
Source: Springer Nature journal article supplement (doi:10.1038/s41598-024-59091-7), 2024-04-10
Supplement: 41598_2024_59091_MOESM1_ESM.pdf [file 41598_2024_59091_MOESM1_ESM.pdf]

# AI-driven remote sensing enhances Mediterranean seagrass monitoring and conservation to combat climate change and anthropogenic impacts

Masuma Chowdhury\*<sup>1,3</sup>, Alejo Martínez-Sansigre<sup>1</sup>, Maruška Mole<sup>1</sup>, Eduardo Alonso Peleato<sup>1</sup>, Nadiia Basos<sup>1</sup>, Jose Manuel Blanco<sup>1</sup>, Maria Ramirez<sup>1</sup>, Isabel Caballero<sup>2</sup>, Ignacio de la Calle<sup>1</sup>

<sup>1</sup>Quasar Science Resources, S. L. Camino de las Ceudas 2, 28232 Las Rozas de Madrid,

Madrid, Spain

masuma.chowdhury@quasarsr.com, amartinez@quasarsr.com,  
maruska.mole@quasarsr.com, eduardo.alonso@quasarsr.com,  
nbasos@quasarsr.com, josemanuelblanco@quasarsr.com,  
maria.ramirez@quasarsr.com, ignaciodelacalle@quasarsr.com

<sup>2</sup>Instituto de Ciencias Marinas de Andalucía (ICMAN), Consejo Superior de Investigaciones Científicas (CSIC), Avenida República Saharaui, 11510 Cadiz, Spain

isabel.caballero@icman.csic.es

<sup>3</sup>Departamento de Física Aplicada, Instituto Universitario de Investigación Marina (INMAR), Universidad de Cádiz, Campus de Excelencia Internacional/Global del Mar (CEI-MAR), Puerto Real (Cadiz), Spain

masuma.chowdhury@uca.es

\*Corresponding author: masuma.chowdhury@quasarsr.com

**Supplementary Table S1.** Details of the satellite images used in Figure 3. The naming convention of the satellite data corresponds to satellite name, sensor name, data level, acquisition date, and tile and orbit names, respectively.

|                                           |                                    |
|-------------------------------------------|------------------------------------|
| Southwestern Mallorca                     | S2B_MSI_L1C_2021_01_17_T31SDD_R008 |
|                                           | S2A_MSI_L1C_2021_03_23_T31SDD_R008 |
|                                           | S2B_MSI_L1C_2021_03_28_T31SDD_R008 |
|                                           | S2B_MSI_L1C_2021_09_04_T31SDD_R008 |
|                                           | S2A_MSI_L1C_2021_10_09_T31SDD_R008 |
| Southeastern Mallorca                     | S2A_MSI_L1C_2021_06_08_T31SED_R108 |
|                                           | S2A_MSI_L1C_2021_07_18_T31SED_R108 |
|                                           | S2A_MSI_L1C_2021_07_28_T31SED_R108 |
|                                           | S2A_MSI_L1C_2021_08_07_T31SED_R108 |
|                                           | S2A_MSI_L1C_2021_08_27_T31SED_R108 |
| Northern Mallorca                         | S2B_MSI_L1C_2021_01_17_T31TDE_R008 |
|                                           | S2A_MSI_L1C_2021_02_01_T31TDE_R008 |
|                                           | S2A_MSI_L1C_2021_02_11_T31TDE_R008 |
|                                           | S2A_MSI_L1C_2021_03_23_T31TDE_R008 |
|                                           | S2B_MSI_L1C_2021_03_28_T31TDE_R008 |
|                                           | S2A_MSI_L1C_2021_04_02_T31TDE_R008 |
|                                           | S2A_MSI_L1C_2021_10_09_T31TDE_R008 |
| Northeastern Mallorca and Western Menorca | S2A_MSI_L1C_2021_05_29_T31TEE_R108 |
|                                           | S2A_MSI_L1C_2021_07_18_T31TEE_R108 |
|                                           | S2B_MSI_L1C_2021_07_23_T31TEE_R108 |
|                                           | S2B_MSI_L1C_2021_08_22_T31TEE_R108 |
|                                           | S2A_MSI_L1C_2021_08_27_T31TEE_R108 |
| Eastern Menorca                           | S2B_MSI_L1C_2021_03_25_T31TFE_R108 |
|                                           | S2A_MSI_L1C_2021_03_30_T31TFE_R108 |
|                                           | S2A_MSI_L1C_2021_07_28_T31TFE_R108 |
|                                           | S2A_MSI_L1C_2021_03_10_T31TFE_R108 |
|                                           | S2A_MSI_L1C_2021_05_29_T31TFE_R108 |
|                                           | S2A_MSI_L1C_2021_07_18_T31TFE_R108 |
|                                           | S2B_MSI_L1C_2021_07_23_T31TFE_R108 |
| Formentera                                | S2B_MSI_L1C_2021_01_17_T31SCC_R008 |
|                                           | S2A_MSI_L1C_2021_03_13_T31SCC_R008 |
|                                           | S2B_MSI_L1C_2021_05_07_T31SCC_R008 |
|                                           | S2B_MSI_L1C_2021_06_26_T31SCC_R008 |
|                                           | S2A_MSI_L1C_2021_07_01_T31SCC_R008 |
|                                           | S2A_MSI_L1C_2021_08_30_T31SCC_R008 |
|                                           | S2B_MSI_L1C_2021_10_24_T31SCC_R008 |
| Ibiza                                     | S2A_MSI_L1C_2021_01_12_T31SCD_R008 |
|                                           | S2A_MSI_L1C_2021_02_11_T31SCD_R008 |
|                                           | S2A_MSI_L1C_2021_03_13_T31SCD_R008 |
|                                           | S2A_MSI_L1C_2021_03_23_T31SCD_R008 |
|                                           | S2A_MSI_L1C_2021_05_02_T31SCD_R008 |
|                                           | S2A_MSI_L1C_2021_05_12_T31SCD_R008 |
|                                           | S2B_MSI_L1C_2021_07_16_T31SCD_R008 |
| S2B_MSI_L1C_2021_08_05_T31SCD_R008        |                                    |

|                     |                                    |
|---------------------|------------------------------------|
|                     | S2B_MSI_L1C_2021_10_24_T31SCD_R008 |
| The Maltese Islands | S2A_MSI_L1C_2021_02_06_T33SVV_R079 |
|                     | S2B_MSI_L1C_2021_04_02_T33SVV_R079 |
|                     | S2A_MSI_L1C_2021_04_07_T33SVV_R079 |

**Supplementary Table S2.** Details of the satellite images used in Figures 5 and S3. The naming convention of the satellite data corresponds to satellite name, sensor name, data level, acquisition date, and tile and orbit names, respectively.

| <b>Year</b>                        | <b>Satellite Image</b>             |                                    |
|------------------------------------|------------------------------------|------------------------------------|
| 2021                               | S2B_MSI_L1C_2021_01_17_T31SCC_R008 |                                    |
|                                    | S2A_MSI_L1C_2021_03_13_T31SCC_R008 |                                    |
|                                    | S2B_MSI_L1C_2021_05_07_T31SCC_R008 |                                    |
|                                    | S2B_MSI_L1C_2021_06_26_T31SCC_R008 |                                    |
|                                    | S2A_MSI_L1C_2021_07_01_T31SCC_R008 |                                    |
|                                    | S2A_MSI_L1C_2021_08_30_T31SCC_R008 |                                    |
|                                    | S2B_MSI_L1C_2021_10_24_T31SCC_R008 |                                    |
|                                    | S2B_MSI_L1C_2020_01_13_T31SCC_R008 |                                    |
| 2020                               | S2A_MSI_L1C_2020_01_28_T31SCC_R008 |                                    |
|                                    | S2B_MSI_L1C_2020_02_02_T31SCC_R008 |                                    |
|                                    | S2B_MSI_L1C_2020_02_22_T31SCC_R008 |                                    |
|                                    | S2A_MSI_L1C_2020_04_07_T31SCC_R008 |                                    |
|                                    | S2B_MSI_L1C_2020_05_02_T31SCC_R008 |                                    |
|                                    | S2A_MSI_L1C_2020_05_27_T31SCC_R008 |                                    |
|                                    | S2B_MSI_L1C_2020_06_21_T31SCC_R008 |                                    |
|                                    | S2A_MSI_L1C_2020_06_26_T31SCC_R008 |                                    |
|                                    | 2019                               | S2B_MSI_L1C_2019_03_09_T31SCC_R008 |
|                                    |                                    | S2A_MSI_L1C_2019_03_14_T31SCC_R008 |
| S2A_MSI_L1C_2019_03_24_T31SCC_R008 |                                    |                                    |
| S2A_MSI_L1C_2019_04_13_T31SCC_R008 |                                    |                                    |
| S2B_MSI_L1C_2019_04_28_T31SCC_R008 |                                    |                                    |
| S2A_MSI_L1C_2019_05_23_T31SCC_R008 |                                    |                                    |
| S2B_MSI_L1C_2019_09_25_T31SCC_R008 |                                    |                                    |
| 2018                               |                                    | S2A_MSI_L1C_2018_04_18_T31SCC_R008 |
|                                    | S2B_MSI_L1C_2018_07_02_T31SCC_R008 |                                    |
|                                    | S2A_MSI_L1C_2018_07_17_T31SCC_R008 |                                    |
|                                    | S2B_MSI_L1C_2018_08_01_T31SCC_R008 |                                    |
|                                    | S2A_MSI_L1C_2018_08_06_T31SCC_R008 |                                    |
|                                    | S2B_MSI_L1C_2018_08_21_T31SCC_R008 |                                    |
|                                    | S2A_MSI_L1C_2018_11_04_T31SCC_R008 |                                    |
|                                    | S2B_MSI_L1C_2018_11_29_T31SCC_R008 |                                    |
|                                    | 2017                               | S2A_MSI_L1C_2017_05_03_T31SCC_R008 |
|                                    |                                    | S2A_MSI_L1C_2017_05_13_T31SCC_R008 |
| S2A_MSI_L1C_2017_05_23_T31SCC_R008 |                                    |                                    |
| S2A_MSI_L1C_2017_06_12_T31SCC_R008 |                                    |                                    |
| S2A_MSI_L1C_2017_06_22_T31SCC_R008 |                                    |                                    |
| S2B_MSI_L1C_2017_07_17_T31SCC_R008 |                                    |                                    |
| S2B_MSI_L1C_2017_10_25_T31SCC_R008 |                                    |                                    |

Supplementary Figure S1: Schematic workflow

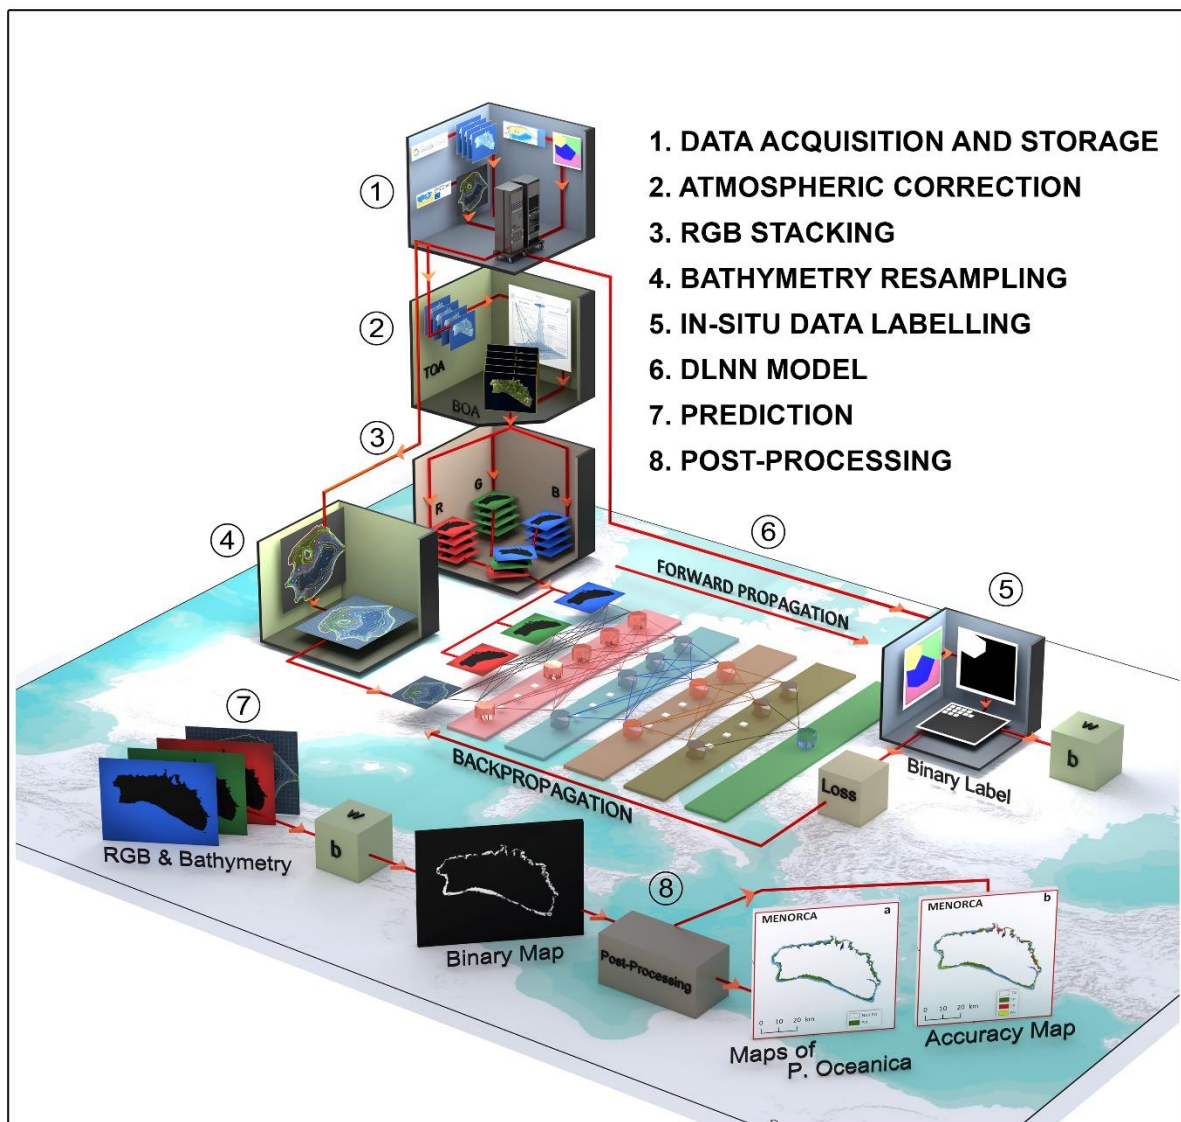

Schematic pipeline, starting with downloading satellite, bathymetry and in-situ data (1), applying atmospheric correction on Sentinel-2 Level-1C top of atmospheric (TOA) reflectance (2), stacking yearly atmospherically corrected red (R), green (G) and blue (B) bands (3), resampling bathymetry data (4), labelling and rasterizing in-situ data (5), training the DLNN model and output weight ( $w$ ) and bias ( $b$ ) (6), predicting the spatial extent of *P. oceanica* (7), and Post-processing to output final maps (8). The arrows indicate the successive steps. Sketchup 2022 (<https://www.sketchup.com/offline-download>) and Photoshop 2023 (<https://www.adobe.com/products/photoshop.html>)

**Supplementary Figure S2: Bathymetry of the study regions**

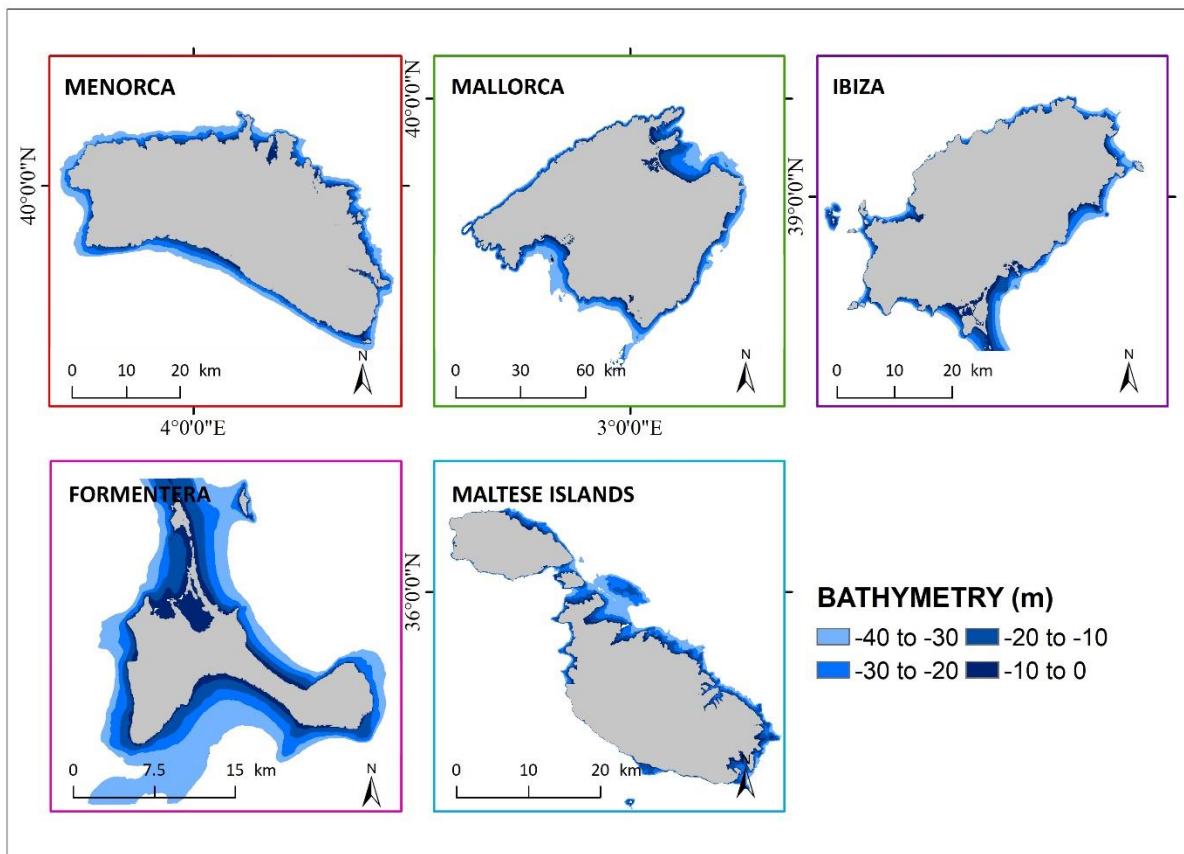

EMODnet bathymetry data used as an input of the DLNN model in mapping *P. oceanica* in the Balearic and the Maltese Islands in the Mediterranean Sea. This data was reprojected and resampled to 10m (using the bilinear interpolation technique) to match the projection system and the spatial resolution of the Sentinel-2 data. The data was cropped after 40m depth to remove open and deep ocean pixels to avoid potential missclassification. Python 3.7

(<https://www.python.org/downloads/release/python-370/>) and ArcGIS 10.5

(<https://desktop.arcgis.com/en/arcmap/10.5/get-started/installation-guide/installing-on-your-computer.htm?>)

**Supplementary Figure S3:** Yearly maps of *P. oceanica* meadows during 2017-2021

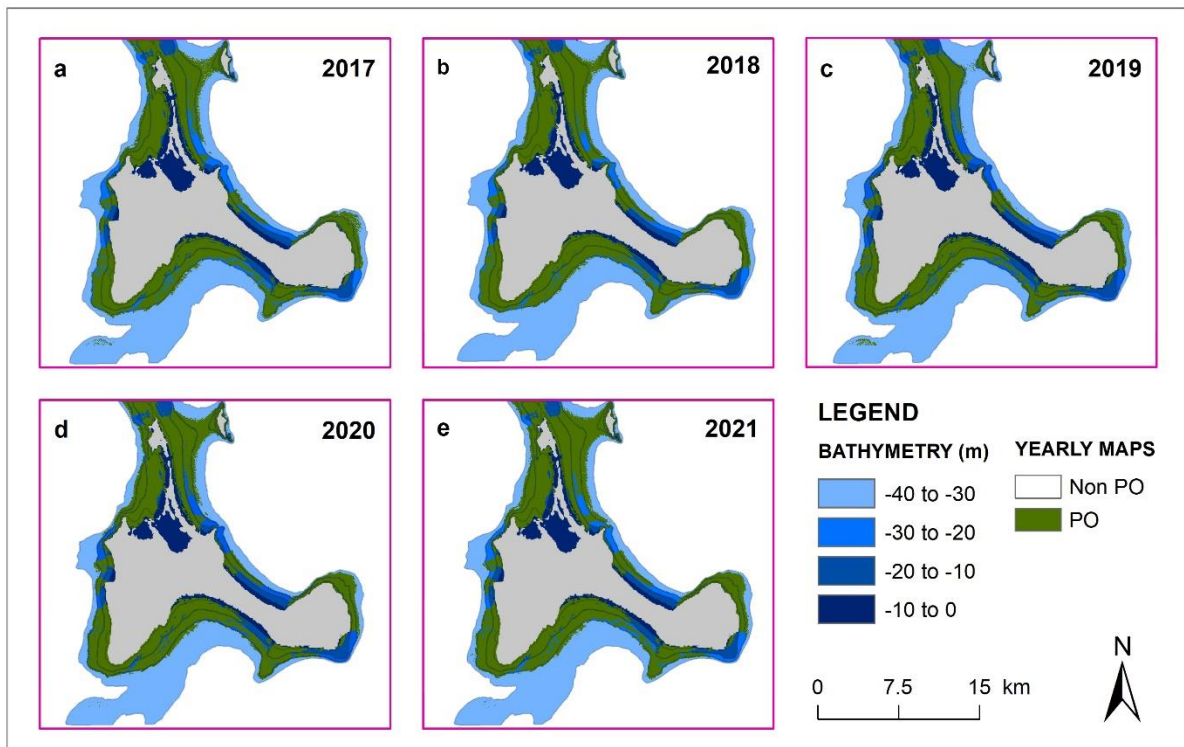

Yearly maps of *P. oceanica* in Formentera during 2017-2021. The seagrass patches mostly looked stable during this period, except the northern part of the Island (at the depth limit of satellite data, i.e.,  $\geq 30\text{m}$ ), where we detected a loss of the meadows until 2019 and then a subsequent gain since 2020, which could be a result of the poor quality of the satellite images (that caused residual noise in the stacked images) used in mapping the meadows. Python 3.7

(<https://www.python.org/downloads/release/python-370/>) and ArcGIS 10.5

(<https://desktop.arcgis.com/en/arcmap/10.5/get-started/installation-guide/installing-on-your-computer.htm?>)
